# Supplementary material
Source: PubMed Central journal article supplement (PMC4427053)

## Supplementary Online Content

Inzucchi SE, Lipska KJ, Mayo H, Bailey CJ, McGuire DK. Metformin in patients with type 2 diabetes and kidney disease: a systematic review. *JAMA*. doi: 10.1001/jama.2014.15298.

**eFigure.** PRISMA Chart of Systematic Literature Review

This supplementary material has been provided by the authors to give readers additional information about their work.

**eFigure.** PRISMA Chart of Systematic Literature Review

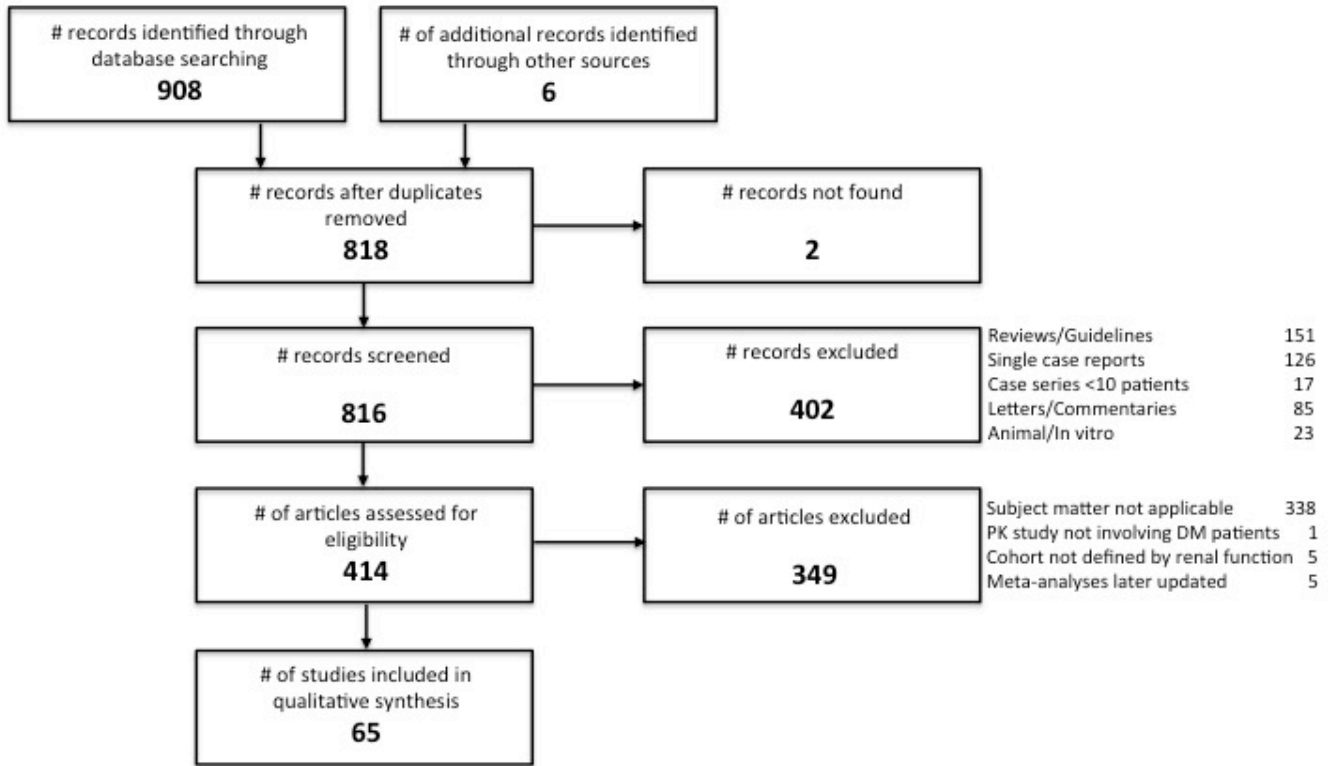

Supplement: NIHMS686487-supplement-Supplemental_Material.pdf [file NIHMS686487-supplement-Supplemental_Material.pdf]
